# Supplementary material for: More than 2500 years of oil exposure shape sediment microbiomes with the potential for syntrophic degradation of hydrocarbons linked to methanogenesis
Source: PubMed Central journal article supplement (PMC5594585; doi:10.1186/s40168-017-0337-8), 2017-09-11

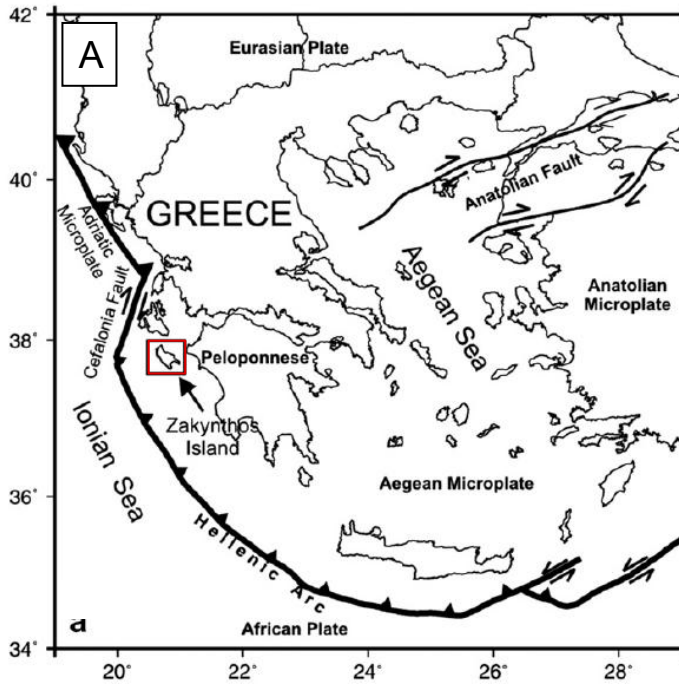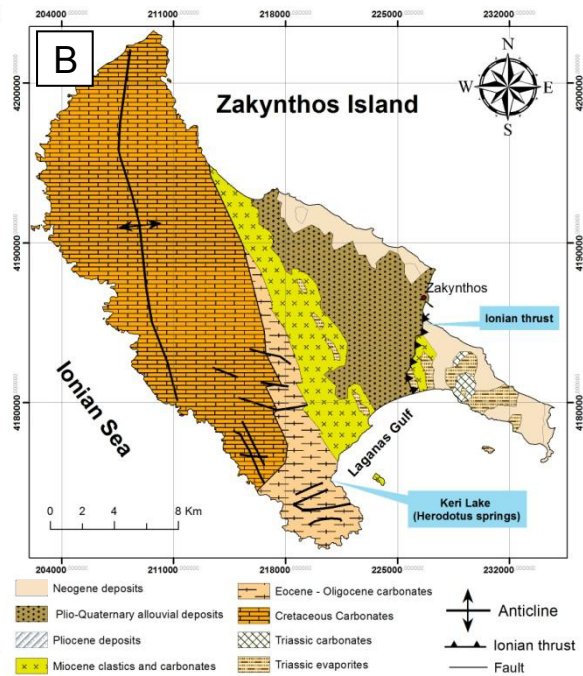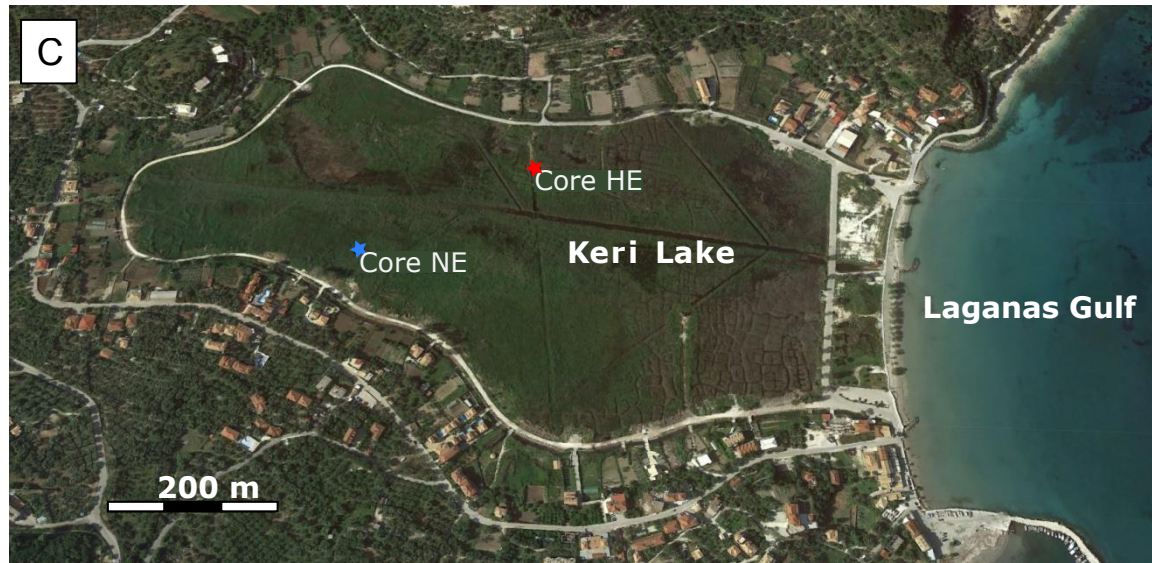

Supplement: 40168_2017_337_MOESM1_ESM.pdf [file 40168_2017_337_MOESM1_ESM.pdf]
